# Supplementary material
Source: PubMed Central journal article supplement (PMC4067532)
Supplement: NIHMS59041-supplement-Supplementary_table_1.pdf [file NIHMS59041-supplement-Supplementary_table_1.pdf]

## Differential gene expression in *Bcl11a* mutant dorsal spinal cord

| Affymetrix ID              | Gene symbol          | Genbank ID | Change <i>P</i> -value | Fold-change  |
|----------------------------|----------------------|------------|------------------------|--------------|
| <b>Downregulated genes</b> |                      |            |                        |              |
| 1447334_at                 | <i>Bcl11a</i>        | BB526119   | 4.81E-08               | -13.45414464 |
| 1419406_a_at               | <i>Bcl11a</i>        | NM_016707  | 4.73E-08               | -8.116123948 |
| 1450260_at                 | <i>Grpr</i>          | M57922     | 3.67E-05               | -6.204484917 |
| 1457072_at                 | <i>Bcl11a</i>        | BF731393   | 7.75E-08               | -5.453025359 |
| 1456632_at                 | <i>Bcl11a</i>        | BB424718   | 1.41E-08               | -5.36405061  |
| 1446293_at                 | <i>Bcl11a</i>        | BB471990   | 4.43E-05               | -4.796960888 |
| 1428642_at                 | <i>Slc35d3</i>       | AK018094   | 6.14E-05               | -3.589984253 |
| 1422825_at                 | <i>Cart</i>          | NM_013732  | 4.59E-05               | -2.882588616 |
| 1457797_at                 | <i>Slc8a1</i>        | AV340788   | 1.51E-05               | -2.674092389 |
| 1446622_at                 | <i>A330068G13Rik</i> | BB191623   | 2.24E-05               | -2.24557795  |
| 1416658_at                 | <i>Frzb</i>          | U91905     | 9.01E-07               | -2.239973937 |
| 1432825_at                 | <i>2900018N21Rik</i> | AK013552   | 2.44E-05               | -2.239020383 |
| 1438239_at                 | <i>Mid1</i>          | BG073178   | 6.4E-05                | -2.153784217 |
| 1433701_at                 | <i>Mpped1</i>        | BB371430   | 2.11E-05               | -2.051349964 |
| 1452656_at                 | <i>Zdhhc2</i>        | BB224658   | 7.02E-05               | -1.96649857  |
| 1436035_at                 | <i>3830431G21Rik</i> | AV225683   | 1.06E-05               | -1.962778283 |
| 1426047_a_at               | <i>Ptprr</i>         | AF129509   | 6.32E-05               | -1.941226429 |
| 1460668_at                 | <i>Gal</i>           | NM_010253  | 2.87E-05               | -1.937069656 |
| 1455869_at                 | <i>Camk2b</i>        | BG862223   | 5.72E-05               | -1.913351264 |
| 1418161_at                 | <i>Jph3</i>          | NM_020605  | 1.30E-05               | -1.905919862 |
| 1445589_at                 | <i>Slc23a2</i>       | BM940232   | 5.47E-05               | -1.902432029 |
| 1434776_at                 | <i>Sema5a</i>        | BQ176610   | 6.04E-05               | -1.86572666  |
| 1437319_at                 | <i>D9Ertd414e</i>    | BG069400   | 1.54E-05               | -1.865635356 |
| 1453098_at                 | <i>Gria2</i>         | AK014389   | 1.82E-05               | -1.863601115 |
| 1437422_at                 | <i>Sema5a</i>        | AV375653   | 7.67E-05               | -1.855922895 |

| Affymetrix ID            | Gene symbol     | Genbank ID | Change <i>P</i> -value | Fold-change |
|--------------------------|-----------------|------------|------------------------|-------------|
| <b>Upregulated genes</b> |                 |            |                        |             |
| 1450736_a_at             | <i>Hbb-bh1</i>  | NM_008219  | 2.20E-09               | 35.61121791 |
| 1437990_x_at             | <i>Hbb-bh1</i>  | AV147727   | 9.03E-09               | 35.26825279 |
| 1437810_a_at             | <i>Hbb-bh1</i>  | AV311770   | 2.67E-07               | 34.62677676 |
| 1429517_at               | <i>Zfyve20</i>  | BC017622   | 3.19E-05               | 7.109685906 |
| 1432589_at               | <i>Plcg1</i>    | BF166706   | 2.81E-07               | 7.013992117 |
| 1430391_a_at             | <i>St8sia4</i>  | AK003690   | 2.91E-06               | 6.301004155 |
| 1420230_at               | <i>AA414993</i> | AA414993   | 2.61E-06               | 6.009843385 |
| 1431196_at               | <i>Atp2c1</i>   | BG296252   | 2.40E-06               | 4.728163341 |
| 1449885_at               | <i>Tmem47</i>   | NM_138751  | 1.43E-07               | 4.722526295 |
| 1429385_at               | <i>Wdr68</i>    | BI082535   | 2.49E-06               | 4.272174849 |
| 1448716_at               | <i>Hba-x</i>    | M26898     | 6.16E-07               | 4.213009015 |
| 1452638_s_at             | <i>Dnm1l</i>    | BC027538   | 1.35E-05               | 4.004418365 |
| 1456255_at               | <i>AI314180</i> | BB553400   | 1.01E-06               | 3.965965013 |
| 1437257_at               | <i>Wdr47</i>    | BB344753   | 1.50E-08               | 3.95664415  |
| 1451610_at               | <i>ECM29l</i>   | BC024561   | 6.51E-06               | 3.952606098 |
| 1427430_at               | <i>AI848100</i> | BB148987   | 5.43E-05               | 3.894914242 |
| 1431064_at               | <i>Dpp8</i>     | BF119821   | 1.64E-05               | 3.802372114 |
| 1420652_at               | <i>Ate1</i>     | BE309332   | 3.60E-05               | 3.642381587 |
| 1448458_at               | <i>Top2b</i>    | BB166592   | 5.88E-07               | 3.634330961 |

|              |                 |           |          |             |
|--------------|-----------------|-----------|----------|-------------|
| 1426505_at   | <i>Evi2b</i>    | AI122415  | 8.92E-06 | 3.632934073 |
| 1424570_at   | <i>Ddx46</i>    | BF023426  | 2.40E-05 | 3.55541412  |
| 1416660_at   | <i>Eif3s10</i>  | AW701127  | 5.64E-05 | 3.506743664 |
| 1423325_at   | <i>Pnn</i>      | AV135835  | 1.05E-05 | 3.497019017 |
| 1444199_at   | <i>Elk4</i>     | AW046689  | 3.97E-05 | 3.477198429 |
| 1419519_at   | <i>Igf1</i>     | NM_010512 | 2.75E-05 | 3.421510667 |
| 1421248_at   | <i>Syn3</i>     | NM_013722 | 2.97E-07 | 3.301289723 |
| 1456343_at   | <i>Slc35f1</i>  | BB540579  | 2.48E-05 | 3.282755202 |
| 1450087_a_at | <i>Nolc1</i>    | NM_053086 | 7.53E-06 | 3.226996335 |
| 1427830_at   | <i>Zfp260</i>   | L36316    | 7.67E-05 | 3.226275533 |
| 1435872_at   | <i>Pim1</i>     | BE631223  | 3.29E-05 | 3.216496521 |
| 1442766_at   | <i>Ppp4r1</i>   | AI846596  | 1.01E-05 | 3.206447054 |
| 1434419_s_at | <i>Tardbp</i>   | AW538183  | 3.15E-05 | 3.189801662 |
| 1444904_at   | <i>Cbfa2t1h</i> | BG068236  | 5.63E-05 | 3.177284101 |
| 1428017_at   | <i>Pknox2</i>   | AF487460  | 1.35E-06 | 3.162853048 |
| 1447871_at   | <i>Mtx2</i>     | BI714072  | 5.88E-07 | 3.061908909 |
| 1450321_at   | <i>Zfp354c</i>  | NM_013922 | 1.26E-05 | 3.057033256 |
| 1416019_at   | <i>Dr1</i>      | NM_026106 | 1.79E-06 | 3.046954246 |
| 1433804_at   | <i>Jak1</i>     | BQ032637  | 4.48E-05 | 2.907430036 |
| 1416748_a_at | <i>Mre11a</i>   | NM_018736 | 2.58E-06 | 2.888036044 |
| 1460304_a_at | <i>Ubtf</i>     | BB832806  | 2.10E-05 | 2.879600247 |
| 1444536_at   | <i>AI462171</i> | AI462171  | 1.89E-05 | 2.878207922 |
| 1440984_at   | <i>Baz2b</i>    | BE943712  | 5.30E-05 | 2.869833884 |
| 1455658_at   | <i>Cggbp1</i>   | BI080272  | 1.05E-06 | 2.864477895 |
| 1431338_at   | <i>Caskin1</i>  | AK014376  | 2.90E-05 | 2.863331895 |
| 1419425_at   | <i>Cnr1</i>     | NM_007726 | 6.34E-08 | 2.851835278 |
| 1443522_s_at | <i>Phip</i>     | BM221262  | 1.14E-05 | 2.850630874 |
| 1418889_a_at | <i>Csnk1d</i>   | NM_139059 | 6.42E-05 | 2.82555789  |
| 1453590_at   | <i>Arl5b</i>    | BQ032239  | 4.07E-05 | 2.810921874 |
| 1445238_at   | <i>Ccl21b</i>   | BB239244  | 1.25E-06 | 2.772489491 |
| 1449504_at   | <i>Kpna1</i>    | U20619    | 3.21E-05 | 2.768349436 |
| 1419344_at   | <i>Tcte1</i>    | NM_013688 | 3.98E-05 | 2.761346663 |
| 1424325_at   | <i>Esco1</i>    | BB308198  | 9.93E-05 | 2.746473362 |
| 1425515_at   | <i>Pik3r1</i>   | M60651    | 3.54E-05 | 2.69283597  |
| 1450243_a_at | <i>Dscr111</i>  | NM_030598 | 2.66E-07 | 2.684780535 |
| 1420899_at   | <i>Rab18</i>    | AW542340  | 6.42E-05 | 2.67333255  |
| 1449548_at   | <i>Efnb2</i>    | U30244    | 1.81E-05 | 2.669096203 |
| 1420816_at   | <i>Ywhag</i>    | NM_018871 | 3.83E-05 | 2.649034404 |
| 1444996_at   | <i>Depdc5</i>   | BG067666  | 1.30E-06 | 2.629950635 |
| 1446926_at   | <i>Pycard</i>   | AU040917  | 1.05E-06 | 2.617144887 |
| 1431274_a_at | <i>Hspa9a</i>   | AA543265  | 2.13E-06 | 2.583065882 |
| 1446682_at   | <i>Zswim6</i>   | BB660139  | 6.46E-05 | 2.564815322 |
| 1449949_a_at | <i>Cxadr</i>    | U90715    | 7.14E-05 | 2.542242336 |
| 1459648_at   | <i>Rutbc3</i>   | BE627992  | 1.14E-05 | 2.498150765 |
| 1432344_a_at | <i>Aplp2</i>    | AK013376  | 2.28E-06 | 2.497216168 |
| 1446484_at   | <i>Mef2c</i>    | BB558401  | 8.13E-06 | 2.490409664 |
| 1415773_at   | <i>Ncl</i>      | BF118393  | 1.80E-06 | 2.484618366 |
| 1421477_at   | <i>Cplx2</i>    | NM_009946 | 6.42E-06 | 2.479666949 |
| 1435009_at   | <i>Slc9a6</i>   | BB611738  | 1.11E-05 | 2.455488305 |
| 1423214_at   | <i>Plxnc1</i>   | BB476707  | 1.93E-05 | 2.387979685 |
| 1424332_at   | <i>Rab40c</i>   | AF422144  | 8.06E-05 | 2.358015469 |
| 1456651_a_at | <i>Tpr</i>      | BG067858  | 4.77E-06 | 2.356109997 |
| 1423329_at   | <i>Gdap1</i>    | AU017649  | 1.90E-05 | 2.350862988 |
| 1416043_at   | <i>Nasp</i>     | BB493242  | 3.65E-05 | 2.335816875 |

|              |                  |           |          |             |
|--------------|------------------|-----------|----------|-------------|
| 1455748_at   | <i>Gpr178</i>    | AI662241  | 2.74E-05 | 2.333911832 |
| 1417781_at   | <i>Lass4</i>     | BB006809  | 1.30E-05 | 2.333638981 |
| 1420982_at   | <i>Rnpc2</i>     | NM_133242 | 2.37E-05 | 2.310019202 |
| 1450522_a_at | <i>H1f0</i>      | NM_008197 | 5.74E-05 | 2.306425231 |
| 1454304_at   | <i>Epn2</i>      | BB626346  | 2.64E-05 | 2.287035859 |
| 1460131_at   | <i>Rnf170</i>    | BG067721  | 1.48E-05 | 2.238187031 |
| 1450392_at   | <i>Abca1</i>     | BB144704  | 2.52E-05 | 2.212401088 |
| 1426714_at   | <i>D11Ert18e</i> | AK003278  | 3.14E-06 | 2.190147066 |
| 1427408_a_at | <i>Thrap3</i>    | BC012655  | 2.24E-06 | 2.177392372 |
| 1426715_s_at | <i>D11Ert18e</i> | AK003278  | 3.59E-05 | 2.150738751 |
| 1421789_s_at | <i>Arf3</i>      | NM_007478 | 9.78E-07 | 2.147247301 |
| 1440228_at   | <i>Ranbp6</i>    | BB477637  | 4.80E-06 | 2.143338627 |
| 1427638_at   | <i>Zbtb16</i>    | Z47205    | 8.42E-06 | 2.141114995 |
| 1425597_a_at | <i>Qk</i>        | AW060288  | 2.42E-05 | 2.126582508 |
| 1442872_at   | <i>BC021438</i>  | BB022993  | 5.72E-06 | 2.09856836  |
| 1451730_at   | <i>Zfp62</i>     | BC022935  | 4.90E-05 | 2.090004098 |
| 1425713_a_at | <i>Rnf146</i>    | BC019182  | 3.43E-05 | 2.089779763 |
| 1425490_a_at | <i>Wdr13</i>     | AK017549  | 1.85E-06 | 2.082986698 |
| 1438686_at   | <i>Eif4g1</i>    | BB531220  | 5.31E-05 | 2.074047996 |
| 1454107_a_at | <i>Kif2a</i>     | AK016720  | 2.30E-05 | 2.070858853 |
| 1450762_s_at | <i>Zfp191</i>    | BF780333  | 7.83E-05 | 2.051713553 |
| 1450407_a_at | <i>Anp32a</i>    | AF022957  | 6.35E-06 | 2.040646039 |
| 1421339_at   | <i>Extl3</i>     | NM_018788 | 4.81E-05 | 2.006553153 |
| 1458676_at   | <i>Nktr</i>      | BB712791  | 3.42E-05 | 2.00603001  |
| 1431328_at   | <i>Ppp1cb</i>    | AK017392  | 2.73E-05 | 2.000893152 |
| 1425631_at   | <i>Ppp1r3c</i>   | U89924    | 2.86E-05 | 1.99903859  |
| 1448127_at   | <i>Rrm1</i>      | BB758819  | 9.49E-05 | 1.993870937 |
| 1443878_at   | <i>Rapgef6</i>   | BB306768  | 2.65E-05 | 1.99328962  |
| 1434282_at   | <i>Ibtk</i>      | BM250711  | 4.11E-05 | 1.988935323 |
| 1460426_at   | <i>Pde4dip</i>   | AI639670  | 3.06E-06 | 1.984632664 |
| 1416701_at   | <i>Rnd3</i>      | BC009002  | 1.64E-05 | 1.983916553 |
| 1449578_at   | <i>Supt16h</i>   | AW536705  | 2.11E-05 | 1.973119101 |
| 1431030_a_at | <i>Rnf14</i>     | AK010162  | 2.65E-05 | 1.970928939 |
| 1425624_at   | <i>Epm2aip1</i>  | BC018474  | 9.24E-05 | 1.962687538 |
| 1460386_a_at | <i>Slc1a1</i>    | AF087578  | 2.41E-05 | 1.955461765 |
| 1444333_at   | <i>Strn3</i>     | BB485260  | 1.93E-05 | 1.955034629 |
| 1458685_at   | <i>Garnl1</i>    | BB552367  | 1.65E-05 | 1.953421381 |
| 1442629_at   | <i>Nt5c2</i>     | AU017183  | 6.50E-05 | 1.951756982 |
| 1456104_at   | <i>Psm11</i>     | BE949498  | 6.46E-05 | 1.950168902 |
| 1426744_at   | <i>Srebf2</i>    | BM123132  | 2.79E-05 | 1.943511478 |
| 1442404_at   | <i>Ncl</i>       | BB624790  | 2.61E-05 | 1.943410453 |
| 1415795_at   | <i>Spin</i>      | BM228780  | 1.83E-05 | 1.942326357 |
| 1447924_at   | <i>Nucks1</i>    | AW048468  | 1.07E-06 | 1.942215708 |
| 1417755_at   | <i>Topors</i>    | NM_134097 | 7.31E-05 | 1.939400843 |
| 1439042_at   | <i>Adcyap1r1</i> | BB427884  | 6.38E-05 | 1.937250691 |
| 1452430_s_at | <i>Sfrs1</i>     | X66091    | 6.39E-05 | 1.917936232 |
| 1453853_a_at | <i>Arhgef12</i>  | AI481688  | 2.04E-05 | 1.913243672 |
| 1425329_a_at | <i>Cyb5r3</i>    | AF332060  | 4.23E-05 | 1.90763443  |
| 1451762_a_at | <i>Kif1b</i>     | AB023656  | 5.13E-05 | 1.904250658 |
| 1416732_at   | <i>Top2b</i>     | BB166592  | 1.20E-05 | 1.900368892 |

Systematic analysis of gene expression in control and Brn4-Cre recombined *Bcl11a* mutant spinal cords using Affymetrix oligonucleotide microarrays (MOE 430 2.0 Gene Chip). Expression profiles were determined at E16.5. The average signal fold change and the change *P*-value from three replicates are shown. Genes were selected based on the following cut-offs: fold change  $\geq 1.9$  for upregulated genes and  $\leq -1.9$  for those downregulated in mutants; change *P*-value  $\leq 0.0001$ .
